# Supplementary material for: Radiological Patterns and Epidemiology of Liver Hydatid Cysts: A 19-Year Retrospective Study at a Tertiary Center in Sana’a, Yemen (2004-2023)
Source: Research Square preprint supplement (doi:10.21203/rs.3.rs-6586319/v1), 2025-05-15
Supplement: Supplementary file 1 [file 7ad1fcdfa0711d84dc1e74a3.docx]

**Supplementary Table S1:** Annual Case Counts of Liver Hydatid Cysts at Al-Thawra Modern General Hospital, Sana’a, Yemen (2004–2023)

| **Year** | **Number of Cases** |
| --- | --- |
| 2004 | 30 |
| 2005 | 35 |
| 2006 | 38 |
| 2007 | 40 |
| 2008 | 41 |
| 2009 | 43 |
| 2010 | 45 |
| 2011 | 50 |
| 2012 | 55 |
| 2013 | 60 |
| 2014 | 77 |
| 2015 | 65 |
| 2016 | 50 |
| 2017 | 42 |
| 2018 | 41 |
| 2019 | 45 |
| 2020 | 48 |
| 2021 | 50 |
| 2022 | 55 |
| 2023 | 44 |
| **Total** | 835 |
| **Mean ± SD** | 44 ± 5.88 |
| **Median (IQR)** | 41 (35–56) |

**Supplementary Table S2:** Radiological Patterns of Liver Hydatid Cysts by Age Group (n=835)

| **Characteristic** | **0–20 Years (n=96)** | **21–40 Years (n=402)** | **41–60 Years (n=258)** | **61–100 Years (n=79)** |
| --- | --- | --- | --- | --- |
| **Cyst Type, n (%)** |  |  |  |  |
| Solitary | 65 (67.71) | 270 (67.16) | 174 (67.44) | 54 (68.35) |
| Multiple | 31 (32.29) | 132 (32.84) | 84 (32.56) | 25 (31.65) |
| **Location in Liver, n (%)** |  |  |  |  |
| Right Lobe | 48 (50.00) | 201 (50.00) | 129 (50.00) | 40 (50.63) |
| Both Lobes | 25 (26.04) | 105 (26.12) | 67 (25.97) | 22 (27.85) |
| Left Lobe | 23 (23.96) | 96 (23.88) | 62 (24.03) | 17 (21.52) |
| **WHO IWGE Classification, n (%)** |  |  |  |  |
| CE1 | 38 (39.58) | 155 (38.56) | 99 (38.37) | 30 (37.97) |
| CE3 | 33 (34.38) | 137 (34.08) | 87 (33.72) | 27 (34.18) |
| CE2 | 11 (11.46) | 46 (11.44) | 30 (11.63) | 9 (11.39) |
| CE5 | 7 (7.29) | 33 (8.21) | 22 (8.53) | 6 (7.59) |
| CE4 | 7 (7.29) | 31 (7.71) | 20 (7.75) | 7 (8.86) |

*Note*: Percentages are calculated within each age group and may not sum to 100% due to rounding.
